# Supplementary material for: Synthesis of novel ZnO/ZnAl2O4 multi co-centric nanotubes and their long-term stability in photocatalytic application
Source: Royal Society of Chemistry journal article supplement (doi:10.1039/c6ra22623j), 2016-01-01
Supplement: c6ra22623j1.pdf [file c6ra22623j1.pdf]

## Synthesis of Novel ZnO/ZnAl<sub>2</sub>O<sub>4</sub> multi co-centric nanotubes and their long-term stability in photocatalytic application

Maryline Nasr,<sup>a,b</sup> Roman Viter,<sup>c</sup> Cynthia Eid,<sup>b</sup> Fabienne Warmont,<sup>d</sup> Roland Habchi,<sup>b</sup> Philippe Miele,<sup>1</sup> Mikhael Bechelany<sup>†a</sup>

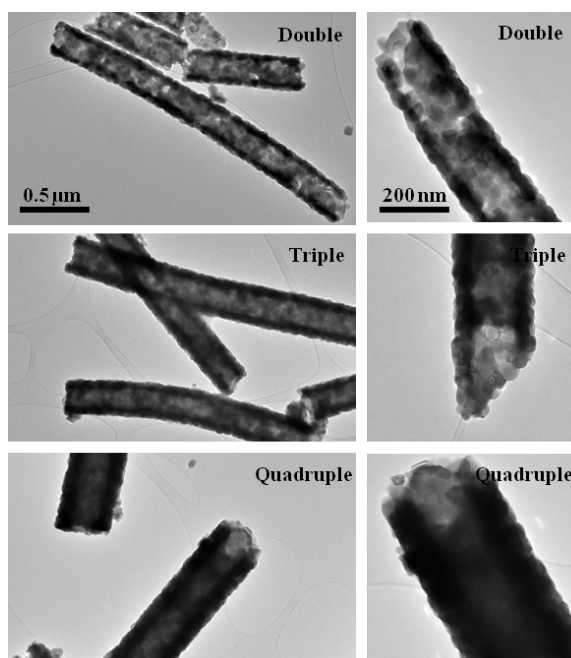

**Figure S1:** TEM images of double, triple and quadruple multi co-centric nanotubes of ZnO/ZnAl<sub>2</sub>O<sub>4</sub>
